# Supplementary material
Source: ML conference proceedings conference paper supplement (https://proceedings.neurips.cc/paper_files/paper/2007/hash/3a30be93eb45566a90f4e95ee72a089a-Abstract.html)

# Temporal Difference (TD) Updating without a Learning Rate

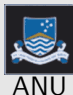

Marcus Hutter  
www.hutter1.net

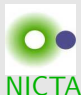

Poster T7

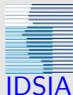

Shane Legg  
www.vetta.org

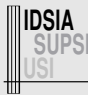

- Reinforcement learning TD update:  
$$V_s^{t+1} = V_s^t + \tilde{\beta}_t(s, s_{t+1})(r_t + \gamma V_{s_{t+1}}^t - V_{s_t}^t)$$
- We derived learning rate  $\tilde{\beta}_t$  for TD with eligibility traces from statistical principles.
- In every setting that we have tested,  
superior performance & fewer parameters to tune

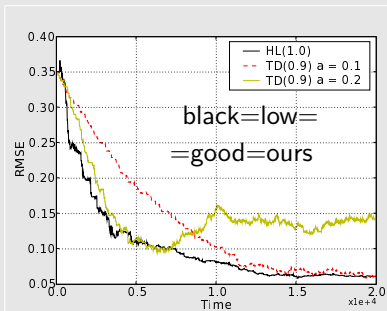

Supplement: Supplementary file [file 3a30be93eb45566a90f4e95ee72a089a-Supplemental.zip]
